# Supplementary material for: Rapid Annotation of Anonymous Sequences from Genome Projects Using Semantic Similarities and a Weighting Scheme in Gene Ontology
Source: PLoS One. 2009 Feb 27;4(2):e4619. doi: 10.1371/journal.pone.0004619 (PMC2645684; doi:10.1371/journal.pone.0004619)
Supplement: Table S1 — The table reports the results obtained from different function prediction web servers for the small test set of 28 proteins (0.07 MB XLS) [file pone.0004619.s006.xls]

## Sheet: Sheet1
Table S5
GO term identical to the original annotation
GO term not related to the original annotation (false positive)
GO term parental, child or related to the original annotation
GO term more specific than the original annotation
AC	original annotation	GO term desc	evidence code	Blast2GO	GO term desc	GOblet	GO term desc	score	InterProScan	GO term desc	GOtcha	GO term desc	score	PhyDBAC	GO term desc	score	JAFA	GO term desc	score	ARGOT	GO term desc	score	ARGOT W/O	GO term desc	score	Blast2GO W/O	GO term desc	PFP	GO term desc	score
O13851	GO:0000010	trans-hexaprenyltranstransferase activity	IMP			GO:0016740	transferase activity	59									GO:0000010	trans-hexaprenyltranstransferase activity	4	GO:0000010	trans-hexaprenyltranstransferase activity	11.143	GO:0016740	transferase activity	14.0522			GO0003824	catalytic activity	659308
	GO:0008834	di-trans,poly-cis-decaprenylcistransferase activity	TAS																	GO:0008834	di-trans,poly-cis-decaprenylcistransferase activity	5.63011	GO:0000010	trans-hexaprenyltranstransferase activity	6.35164			GO0004337	geranyltranstransferase activity	122707
	GO:0016740	transferase activity	IEA																									GO0004311	farnesyltranstransferase activity	115990
																												GO0000287	magnesium ion binding	112415
																												GO0000010	trans-hexaprenyltranstransferase activity	108347
O14185	GO:0005515	protein binding	IPI	GO:0030674	protein binding, bridging	GO:0005099	Ras GTPase activator activity	38									GO:0051015	actin filament binding	1.25	GO:0051015	actin filament binding	8.09833	GO:0003779	actin binding	5.10624	GO:0030674	protein binding, bridging	GO0005523	tropomyosin binding	123678
	GO:0051015	actin filament binding	IDA	GO:0051015	actin filament binding																					GO:0051015	actin filament binding	GO0030676	Rac guanyl-nucleotide exchange factor activity	97227.8
																												GO0005099	Ras GTPase activator activity	61997.9
																												GO0017124	SH3 domain binding	38761.6
																												GO0005516	calmodulin binding	37820
O14368	GO:0005515	protein binding	IPI														GO:0003677	DNA binding	0.75	GO:0051082	unfolded protein binding	3.53501						GO0008047	enzyme activator activity	56002.6
	GO:0051082	unfolded protein binding	IDA														GO:0005515	protein binding	0.5									GO0051082	unfolded protein binding	40819.1
																												GO0004674	protein serine/threonine kinase activity	31905.5
																												GO0000166	nucleotide binding	28247.6
																												GO0016301	kinase activity	27815.9
O42971	GO:0004842	ubiquitin-protein ligase activity	IC	GO:0004842	ubiquitin-protein ligase activity	GO:0005515	protein binding	98	GO:0005515	protein binding							GO:0005515	protein binding	1	GO:0005515	protein binding	20.0396	GO:0005515	protein binding	20.3886	GO:0004842	ubiquitin-protein ligase activity	GO0004842	ubiquitin-protein ligase activity	146471
	GO:0005515	protein binding	IPI	GO:0005515	protein binding												GO:0004842	ubiquitin-protein ligase activity	1.5							GO:0005515	protein binding	GO0046872	metal ion binding	142677
																												GO0000166	nucleotide binding	128546
																												GO0008270	zinc ion binding	112364
																												GO0005524	ATP binding	63015.9
O43091	GO:0000010	trans-hexaprenyltranstransferase activity	IMP	GO:0003824	catalytic activity												GO:0000010	trans-hexaprenyltranstransferase activity	1	GO:0016740	transferase activity	13.9004	GO:0016740	transferase activity	14.0209	GO:0003824	catalytic activity	GO0000287	magnesium ion binding	863290	MF
	GO:0046982	protein heterodimerization activity	IPI																	GO:0000010	trans-hexaprenyltranstransferase activity	5.60936	GO:0000010	trans-hexaprenyltranstransferase activity	4.34338			GO0004337	geranyltranstransferase activity	843272	MF
	GO:0016740	transferase activity	IEA																				GO:0050347	trans-octaprenyltranstransferase activity	3.10782			GO0000010	trans-hexaprenyltranstransferase activity	457193	MF
																												GO0003824	catalytic activity	305985	MF
																												GO0004161	dimethylallyltranstransferase activity	274633	MF
O59793	GO:0005515	protein binding	IPI																	GO:0046982	protein heterodimerization activity	19.7007						GO0000166	nucleotide binding	17159.5
	GO:0046982	protein heterodimerization activity	IPI																	GO:0005515	protein binding	18.171						GO0042805	actinin binding	13805.3
																												GO0016301	kinase activity	9270.25
																												GO0008017	microtubule binding	7742.8
																												GO0030159	receptor signaling complex scaffold activity	6951.5
O74335	GO:0005100	Rho GTPase activator activity	IDA	GO:0005100	Rho GTPase activator activity	GO:0005515	protein binding	117						GO:0030695	GTPase regulator activity	1232	GO:0030695	GTPase regulator activity	0.67	GO:0005100	Rho GTPase activator activity	9.00307	GO:0005096	GTPase activator activity	6.78731	GO:0005100	Rho GTPase activator activity	GO0035091	phosphoinositide binding	455369	MF
	GO:0005096	GTPase activator activity	IEA			GO:0005100	Rho GTPase activator activity	117						GO:0030234	enzyme regulator activity	51.3												GO0046872	metal ion binding	413251	MF
						GO:0004871	signal transducer activity	117																				GO0016564	transcriptional repressor activity	328266	MF
						GO:0046872	metal ion binding	37																				GO0016887	ATPase activity	282712	MF
						GO:0008270	zinc ion binding	37																				GO0000166	nucleotide binding	271484	MF
O74467	GO:0018024	histone-lysine N-methyltransferase activity	TAS			GO:0016787	hydrolase activity	37									GO:0008270	zinc ion binding	1.25	GO:0008168	methyltransferase activity	8.80603						GO0008757	S-adenosylmethionine-dependent methyltransferase activity	256865
	GO:0016740	transferase activity	IEA			GO:0008270	zinc ion binding	37												GO:0018024	histone-lysine N-methyltransferase activity	7.77352						GO0008276	protein methyltransferase activity	152926
	GO:0008168	methyltransferase activity	IEA																									GO0042054	histone methyltransferase activity	77804.9
																												GO0018024	histone-lysine N-methyltransferase activity	62882.2
																												GO0003735	structural constituent of ribosome	58383.2
O74803	GO:0031593	polyubiquitin binding	TAS						GO:0003684	damaged DNA binding							GO:0003684	damaged DNA binding	1.33	GO:0003684	damaged DNA binding	27.7917	GO:0003684	damaged DNA binding	28.916			GO0004308	exo-alpha-sialidase activity	679900
	GO:0043130	ubiquitin binding	IDA														GO:0003677	DNA binding	1									GO0046966	thyroid hormone receptor binding	437232
	GO:0003684	damaged DNA binding	IEA																									GO0005515	protein binding	155538
																												GO0008581	ubiquitin-specific protease 5 activity	124463
																												GO0017154	semaphorin receptor activity	119129
O94436	GO:0005515	protein binding	IPI			GO:0016787	hydrolase activity	35									GO:0016251	general RNA polymerase II transcription factor activity	1	GO:0003743	translation initiation factor activity	6.3826	GO:0003743	translation initiation factor activity	7.98464			GO0003702	RNA polymerase II transcription factor activity	14865
	GO:0016251	general RNA polymerase II transcription factor activity	IC			GO:0008451	X-Pro aminopeptidase activity	35												GO:0005515	protein binding	5.63254						GO0003924	GTPase activity	14851.8
	GO:0017025	TATA-binding protein binding	IPI																	GO:0016251	general RNA polymerase II transcription factor activity	5.56713						GO0003677	DNA binding	11042
																				GO:0017025	TATA-binding protein binding	4.75456						GO0042623	ATPase activity, coupled	9827.47
																												GO0008307	structural constituent of muscle	8861.75
P36618	GO:0005096	GTPase activator activity	IGI			GO:0005509	calcium ion binding	37	GO:0005097	Rab GTPase activator activity							GO:0005096	GTPase activator activity	1.5	GO:0005097	Rab GTPase activator activity	21.226	GO:0005097	Rab GTPase activator activity	21.8			GO0030165	PDZ domain binding	101160
	GO:0005515	protein binding	IPI																									GO0004221	ubiquitin thiolesterase activity	98001.4
	GO:0005097	Rab GTPase activator activity	IEA																									GO0003676	nucleic acid binding	51918.8
																												GO0000287	magnesium ion binding	13282.6
																												GO0005515	protein binding	13196.4
P91745	GO:0008061	chitin binding	IDA	GO:0008061	chitin binding	GO:0008061	chitin binding	260	GO:0008061	chitin binding							GO:0008061	chitin binding	1.33	GO:0008061	chitin binding	25.8769	GO:0008061	chitin binding	25.5131			GO0008061	chitin binding	88054.6
						GO:0005515	protein binding	115									GO:0005509	calcium ion binding	1.33									GO0003824	catalytic activity	33272
																												GO0004289	subtilase activity	21259.2
																												GO0008368	Gram-negative bacterial binding	19561.4
																												GO0015035	protein disulfide oxidoreductase activity	18566.3
Q10235	GO:0005515	protein binding	IPI			GO:0005488	binding	36									GO:0043014	alpha-tubulin binding	1.67	GO:0043014	alpha-tubulin binding	6.40274						GO0004221	ubiquitin thiolesterase activity	199754
	GO:0043014	alpha-tubulin binding	IPI														GO:0008017	microtubule binding	1.67									GO0042803	protein homodimerization activity	135980
																												GO0019901	protein kinase binding	83916.7
																												GO0003777	microtubule motor activity	70577
																												GO0008270	zinc ion binding	64423.6
Q10282	GO:0003924	GTPase activity	IC			GO:0004871	signal transducer activity	176												GO:0004871	signal transducer activity	4.16632						GO0004674	protein serine/threonine kinase activity	1.5057e+06
	GO:0004871	signal transducer activity	IEA			GO:0000166	nucleotide binding	133																				GO0003924	GTPase activity	1.42973e+06
																												GO0004871	signal transducer activity	1.20029e+06
																												GO0030693	caspase activity	916452
																												GO0017069	snRNA binding	732510
Q10434	GO:0051015	actin filament binding	IDA	GO:0003779	actin binding	GO:0003779	actin binding	93	GO:0003779	actin binding							GO:0003779	actin binding	2	GO:0003779	actin binding	28.6849	GO:0003779	actin binding	28.3148	GO:0003779	actin binding	GO0003779	actin binding	114152
	GO:0003779	actin binding	IEA																	GO:0051015	actin filament binding	3.47049						GO0016874	ligase activity	17321
																												GO0004360	glutamine-fructose-6-phosphate transaminase (isomerizing) activity	16544.6
																												GO0008795	NAD+ synthase activity	9297.72
																												GO0000166	nucleotide binding	7568.11
Q54EY2	GO:0005525	GTP binding	IC	GO:0003743	translation initiation factor activity	GO:0003743	translation initiation factor activity	117			GO:0003674	molecular_function	54				GO:0005525	GTP binding	1.25	GO:0003743	translation initiation factor activity	14.6767	GO:0003743	translation initiation factor activity	14.4045	GO:0003743	translation initiation factor activity	GO0003824	catalytic activity	557244
	GO:0003743	translation initiation factor activity	IEA	GO:0005085	guanyl-nucleotide exchange factor activity						GO:0005488	binding	54				GO:0003743	translation initiation factor activity	0.75	GO:0005085	guanyl-nucleotide exchange factor activity	3.89938	GO:0005085	guanyl-nucleotide exchange factor activity	4.26507	GO:0005085	guanyl-nucleotide exchange factor activity	GO0005525	GTP binding	489240
				GO:0005524	ATP binding						GO:0003676	nucleic acid binding	54							GO:0005525	GTP binding	3.34823				GO:0005524	ATP binding	GO0046523	S-methyl-5-thioribose-1-phosphate isomerase activity	444831
				GO:0005515	protein binding						GO:0003743	translation initiation factor activity	54													GO:0005515	protein binding	GO0005085	guanyl-nucleotide exchange factor activity	236668
				GO:0005525	GTP binding						GO:0045182	translation regulator activity	54													GO:0005525	GTP binding	GO0003743	translation initiation factor activity	126876
											GO:0008135	translation factor activity, nucleic acid binding	54
Q54XY1	GO:0047499	calcium-independent phospholipase A2 activity	IDA			GO:0005525	GTP binding	37									GO:0004620	phospholipase activity	1.5	GO:0016787	hydrolase activity	13.2426	GO:0016787	hydrolase activity	11.5739			GO0016787	hydrolase activity	568744
	GO:0016787	hydrolase activity	IEA																									GO0004623	phospholipase A2 activity	193886
																												GO0045735	nutrient reservoir activity	9008.66
																												GO0003924	GTPase activity	5803.96
																												GO0000166	nucleotide binding	3909.49
Q55DY7	GO:0008233	peptidase activity	IDA	GO:0004298	threonine endopeptidase activity	GO:0004298	threonine endopeptidase activity	62	GO:0004298	threonine endopeptidase activity	GO:0003674	molecular_function	40				GO:0004298	threonine endopeptidase activity	2.5	GO:0004298	threonine endopeptidase activity	21.0854	GO:0004298	threonine endopeptidase activity	21.2673	GO:0004175	endopeptidase activity	GO0008233	peptidase activity	1.98005e+06
	GO:0004298	threonine endopeptidase activity	IEA								GO:0003824	catalytic activity	40							GO:0008233	peptidase activity	18.9172	GO:0008233	peptidase activity	18.8373			GO0004298	threonine endopeptidase activity	1.77233e+06
											GO:0016787	hydrolase activity	40							GO:0004175	endopeptidase activity	12.3153	GO:0004175	endopeptidase activity	12.4297			GO0016787	hydrolase activity	1.61225e+06
											GO:0008233	peptidase activity	40															GO0004197	cysteine-type endopeptidase activity	487758
											GO:0004175	endopeptidase activity	40															GO0003723	RNA binding	393387
											GO:0004298	threonine endopeptidase activity	40
Q801X7	GO:0005529	sugar binding	IDA	GO:0005529	sugar binding	GO:0005529	sugar binding	57	GO:0005529	sugar binding							GO:0016936	galactoside binding	1.25	GO:0005529	sugar binding	31.0466	GO:0005529	sugar binding	30.8217			GO0019863	IgE binding	208018
																	GO:0005529	sugar binding	0.75									GO0004871	signal transducer activity	200587
																												GO0004622	lysophospholipase activity	99147.3
																												GO0030395	lactose binding	92178.5
																												GO0004759	serine esterase activity	77957.2
Q8WZJ9	GO:0005459	UDP-galactose transmembrane transporter activity	IGI																	GO:0005351	sugar:hydrogen symporter activity	8.4872	GO:0005351	sugar:hydrogen symporter activity	8.62368			GO0016874	ligase activity	15848.3	MF
	GO:0005351	sugar:hydrogen ion symporter activity	IEA																									GO0003723	RNA binding	5852.52	MF
																												GO0004826	phenylalanine-tRNA ligase activity	3832.81	MF
																												GO0046872	metal ion binding	3651.61	MF
																												GO0000287	magnesium ion binding	3646.09	MF
Q92373	GO:0003697	single-stranded DNA binding	IDA			GO:0003676	nucleic acid binding	52												GO:0003676	nucleic acid binding	14.5677	GO:0003676	nucleic acid binding	14.3958			GO0005515	protein binding	98317.6
	GO:0003676	nucleic acid binding	IEA																	GO:0003697	single-stranded DNA binding	3.81373						GO0003676	nucleic acid binding	25668.4
																												GO0008270	zinc ion binding	11194.9
																												GO0003723	RNA binding	5860.08
																												GO0046961	hydrogen-transporting ATPase activity, rotational mechanism	5820.03
Q9LNF2	GO:0046910	pectinesterase inhibitor activity	IDA	GO:0046910	pectinesterase inhibitor activity	GO:0004857	enzyme inhibitor activity	74	GO:0004857	enzyme inhibitor activity							GO:0030599	pectinesterase activity	1.25	GO:0004857	enzyme inhibitor activity	30.1493	GO:0030599	pectinesterase activity	30.3364	GO:0046910	pectinesterase inhibitor activity	GO0030599	pectinesterase activity	50066.5
	GO:0030599	pectinesterase activity	IEA			GO:0030599	pectinesterase activity	74	GO:0030599	pectinesterase activity							GO:0004857	enzyme inhibitor activity	0.5	GO:0030599	pectinesterase activity	28.0092	GO:0004857	enzyme inhibitor activity	27.1852			GO0045330	aspartyl esterase activity	49775
	GO:0004857	enzyme inhibitor activity	IEA																	GO:0046910	pectinesterase inhibitor activity	14.94	GO:0046910	pectinesterase inhibitor activity	5.0274			GO0004857	enzyme inhibitor activity	25007.9
																												GO0000166	nucleotide binding	14192.5
																												GO0004042	amino-acid N-acetyltransferase activity	11441.6
Q9RC23	GO:0016491	oxidoreductase activity	IDA	GO:0016491	oxidoreductase activity	GO:0016874	ligase activity	40	GO:0003824	catalytic activity	GO:0003674	molecular_function	37	GO:0042083	5,10-methylenetetrahydrofolate-dependent methyltransferase activity	27.9	GO:0004799	thymidylate synthase activity	1.5	GO:0016829	lyase activity	9.9234	GO:0004633	phosphopantothenoylcysteine decarboxylase activity	10.6939			GO0004633	phosphopantothenoylcysteine decarboxylase activity	129927
	GO:0003824	catalytic activity	IEA	GO:0016829	lyase activity						GO:0003824	catalytic activity	37	GO:0004799	thymidylate synthase activity	27.9	GO:0004633	phosphopantothenoylcysteine decarboxylase activity	1.25	GO:0004633	phosphopantothenoylcysteine decarboxylase activity	8.70942	GO:0016829	lyase activity	9.8189			GO0016491	oxidoreductase activity	101269
	GO:0016829	lyase activity	IEA								GO:0016829	lyase activity	37				GO:0004632	phosphopantothenate--cysteine ligase activity	1.25	GO:0004632	phosphopantothenate--cysteine ligase activity	6.7297	GO:0004632	phosphopantothenate--cysteine ligase activity	8.44882			GO0016874	ligase activity	46166.8
											GO:0016831	carboxy-lyase activity	37				GO:0003824	catalytic activity	0.25	GO:0016874	ligase activity	6.08565	GO:0016874	ligase activity	7.54622			GO0016831	carboxy-lyase activity	31358.3
											GO:0004633	phosphopantothenoylcysteine decarboxylase activity	37															GO0016829	lyase activity	16106.4
											GO:0016830	carbon-carbon lyase activity	37
Q9US59	GO:0005515	protein binding	IPI	GO:0042169	SH2 domain binding	GO:0003779	actin binding	45									GO:0042623	ATPase activity, coupled	2	GO:0005515	protein binding	16.0137	GO:0004713	protein tyrosine kinase activity	9.21027	GO:0042169	SH2 domain binding	GO0045309	protein phosphorylated amino acid binding	514643
	GO:0019901	protein kinase binding	IDA	GO:0004713	protein tyrosine kinase activity												GO:0005524	ATP binding	1.25	GO:0019901	protein kinase binding	12.2372	GO:0005515	protein binding	6.44468	GO:0004713	protein tyrosine kinase activity	GO0004722	protein serine/threonine phosphatase activity	478597
				GO:0004722	protein serine/threonine phosphatase activity												GO:0005515	protein binding	0.5	GO:0004713	protein tyrosine kinase activity	7.35587	GO:0000166	nucleotide binding	4.89588	GO:0004722	protein serine/threonine phosphatase activity	GO0003924	GTPase activity	453819
																				GO:0000166	nucleotide binding	3.92997	GO:0005524	ATP binding	3.71279			GO0046872	metal ion binding	376943
																												GO0008424	glycoprotein 6-alpha-L-fucosyltransferase activity	307829
Q9USH7	GO:0005484	SNAP receptor activity	TAS	GO:0005486	SNAP receptor activity	GO:0008565	protein transporter activity	40	GO:0005484	SNAP receptor activity							GO:0005484	SNAP receptor activity	0.75	GO:0005515	protein binding	24.4697	GO:0005515	protein binding	24.5145	GO:0005486		GO0008565	protein transporter activity	1.96612e+06
	GO:0005515	protein binding	IEA						GO:0005515	protein binding							GO:0008565	protein transporter activity	0.5	GO:0005484	SNAP receptor activity	17.3704	GO:0005484	SNAP receptor activity	16.0898			GO0005234	glutamate-gated ion channel activity	518080
																	GO:0005515	protein binding	0.5									GO0000149	SNARE binding	463994
																												GO0016524	latrotoxin receptor activity	270167
																												GO0004713	protein-tyrosine kinase activity	132157
Q9UST6	GO:0005515	protein binding	IPI			GO:0042623	ATPase activity, coupled	35												GO:0042803	protein homodimerization activity	17.8253						GO0016887	ATPase activity	403116
	GO:0042803	protein homodimerization activity	IPI			GO:0051087	chaperone binding	35																				GO0000146	microfilament motor activity	214123
																												GO0008270	zinc ion binding	122336
																												GO0042803	protein homodimerization activity	113665
																												GO0005215	transporter activity	77911.5
Q9UT48	GO:0003743	translation initiation factor activity	IC			GO:0003743	translation initiation factor activity	111			GO:0003674	molecular_function	42							GO:0003743	translation initiation factor activity	15.0855	GO:0003743	translation initiation factor activity	13.8345			GO0046872	metal ion binding	111392
											GO:0005488	binding	42															GO0030234	enzyme regulator activity	36970.3
											GO:0003676	nucleic acid binding	42															GO0008270	zinc ion binding	29664
											GO:0045182	translation regulator activity	42															GO0008237	metallopeptidase activity	18270.1
											GO:0008135	translation factor activity, nucleic acid binding	42															GO0030955	potassium ion binding	16743.5
											GO:0003743	translation initiation factor activity	42
Q9Y7Q6	GO:0018024	histone-lysine N-methyltransferase activity	TAS								GO:0003674	molecular_function	58				GO:0018024	histone-lysine N-methyltransferase activity	1.75	GO:0008168	methyltransferase activity	7.57638	GO:0008270	zinc ion binding	6.52872			GO0043169	cation binding	8555.84
	GO:0008168	methyltransferase activity	IEA								GO:0003824	catalytic activity	58				GO:0008270	zinc ion binding	1.25	GO:0018024	histone-lysine N-methyltransferase activity	6.83096	GO:0003824	catalytic activity	5.2774			GO0003968	RNA-directed RNA polymerase activity	8456.02
	GO:0016740	transferase activity	IEA								GO:0016740	transferase activity	58							GO:0008270	zinc ion binding	3.84203	GO:0016787	hydrolase activity	3.87693			GO0000166	nucleotide binding	8335.59
											GO:0008170	N-methyltransferase activity	58															GO0009982	pseudouridine synthase activity	5933.71
											GO:0042054	histone methyltransferase activity	58															GO0047480	UDP-N-acetylmuramoyl-tripeptide-D-alanyl-D-alanine ligase activity	4405.19
											GO:0018024	histone-lysine N-methyltransferase activity	58
											GO:0016278	lysine N-methyltransferase activity	58
											GO:0016279	protein-lysine N-methyltransferase activity	58
											GO:0008276	protein methyltransferase activity	58
											GO:0008168	methyltransferase activity	58
											GO:0008757	S-adenosylmethionine-dependent methyltransferase activity	58
											GO:0016741	transferase activity, transferring one-carbon groups	58
											GO:0005488	binding	42
											GO:0043169	cation binding	42
											GO:0046914	transition metal ion binding	42
											GO:0046872	metal ion binding	42
											GO:0043167	ion binding	42
											GO:0008270	zinc ion binding	42
